# Supplementary material for: Bimetallic Au–Pd nanochain networks: facile synthesis and promising application in biaryl synthesis
Source: Royal Society of Chemistry journal article supplement (doi:10.1039/c7nj00998d), 2017-01-01
Supplement: c7nj00998d1.pdf [file c7nj00998d1.pdf]

## Supporting Information

### **Bimetallic Au-Pd Nanochain Networks: Facile Synthesis and Promising Application in Biaryl Synthesis**

Zheng-Jun Wang,<sup>a</sup> Xia Wang,<sup>a</sup> Jing-Jing Lv,<sup>b</sup> Jiu-Ju Feng,<sup>b</sup> Xinhua Xu,<sup>a\*</sup> and Ai-Jun Wang,<sup>b\*</sup>

Zhiwu Liang<sup>a</sup>

<sup>a</sup>State Key Laboratory of Chemo/Biosensing and Chemometrics, College of Chemistry and  
Chemical Engineering, Hunan University, Changsha 410000, China

<sup>b</sup>College of Geography and Environmental Science, College of Chemistry and Life Science,  
Zhejiang Normal University, Jinhua 321004, China

\*Corresponding Authors: <sup>a</sup>Tel./Fax:+86 731 8882-1546; e-mails: xhx1581@hnu.edu.cn;

<sup>b</sup>Tel./Fax:+86 579 82282269; e-mails: ajwang@zjnu.cn

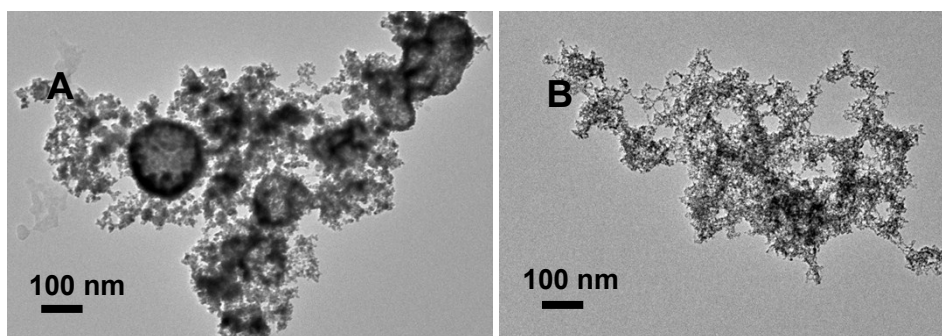

**Figure S1.** TEM images of the Au-Pd products obtained with 5 mM (A), 70 mM (B) of 4-AP.

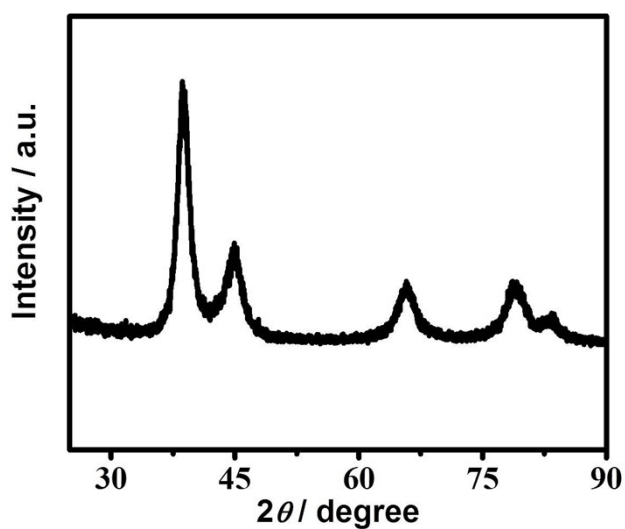

**Figure S2.** XRD pattern of the Au-Pd NNCs after used for 5 times.

**Table S1.** Elemental analysis of the Au-Pd NNCs by ICP-MS.

| Element | Before reaction (mg/L) | After fifth cycle(mg/L) | Leaching (mg/L) |
|---------|------------------------|-------------------------|-----------------|
| Pd      | 67.3                   | 66.7                    | 0.6             |
| Au      | 33.4                   | 32.2                    | 1.2             |

**Characterization Data of Products:** 2a-n are known compounds.<sup>1-6</sup> And analytical data of the corresponding products are summarized as follows:

**Biphenyl (2a):** White solid, MP: 68-69 °C; <sup>1</sup>H NMR (400 MHz, CDCl<sub>3</sub>): δ (ppm) 7.35 (t, 2 H, J = 7.4 Hz), 7.44 (t, 4 H, J = 7.6 Hz), 7.59 (d, 4 H, J = 7.6 Hz). <sup>13</sup>C NMR (100 MHz, CDCl<sub>3</sub>): δ (ppm) 127.17, 127.25, 128.75, 141.26. MS (EI): m/z 154.1.

**4, 4'-Dimethylbiphenyl (2b):** White solid, MP: 119-120 °C; <sup>1</sup>H NMR (400 MHz, CDCl<sub>3</sub>): δ (ppm) 2.39 (s, 6 H), 7.24 (t, 4 H, J = 5.8 Hz), 7.47 (d, 4 H, J = 8.0 Hz). <sup>13</sup>C NMR (100 MHz, CDCl<sub>3</sub>): δ (ppm) 21.51, 124.86, 127.54, 133.31, 141.71. MS (EI): m/z 182.1.

**4, 4'-Dimethoxybiphenyl (2c):** White solid, MP: 178-179 °C; <sup>1</sup>H NMR (400 MHz, CDCl<sub>3</sub>): δ (ppm) 3.84 (s, 6 H), 6.95 (d, 4 H, J = 8.8 Hz), 7.47 (d, 4 H, J = 8.4 Hz). <sup>13</sup>C NMR (100 MHz, CDCl<sub>3</sub>): δ (ppm) 55.16, 113.98, 127.54, 133.31, 158.51. MS (EI): m/z 214.1.

**3, 3'-Dimethoxybiphenyl (2d):** White solid, MP: 45-47 °C; <sup>1</sup>H NMR (400 MHz, CDCl<sub>3</sub>): δ (ppm) 3.86 (s, 6 H), 6.88-6.91 (m, 2 H), 7.12 (s, 2H), 7.17 (d, 2 H, J = 7.8 Hz), 7.35 (t, 2 H, J = 7.8 Hz). <sup>13</sup>C NMR (100 MHz, CDCl<sub>3</sub>): δ (ppm) 55.33, 112.84, 112.97, 119.73, 129.74, 142.66, 159.92. MS (EI): m/z 214.1.

**2, 2'-Dimethoxybiphenyl (2e):** White solid, MP: 241-244 °C; <sup>1</sup>H NMR

(400 MHz, CDCl<sub>3</sub>):  $\delta$  (ppm) 3.89 (s, 6 H), 6.83 (t, 3 H, J = 7.6 Hz), 8.89 (d, 2H, J = 8.0 Hz), 7.27 (t, 2 H, J = 7.4 Hz), 7.52-7.54 (m, 2H). <sup>13</sup>C NMR (100 MHz, CDCl<sub>3</sub>):  $\delta$  (ppm) 56.16, 111.70, 121.82, 128.53, 133.36, 155.86. MS (EI): m/z 214.1.

**4, 4'-Dinitro-biphenyl (2f):** Pale yellow solid, MP 241-244 °C; <sup>1</sup>H NMR (400 MHz, CDCl<sub>3</sub>):  $\delta$  (ppm) 7.60 (t, 4 H, J = 4.4 Hz), 8.02 (d, 4 H, J = 8.8 Hz), <sup>13</sup>C NMR (100 MHz, CDCl<sub>3</sub>):  $\delta$  (ppm) 125.01, 129.99, 132.63, 147.03. MS (EI): m/z 244.2.

**2, 2', 6, 6'-Tetramethyl-biphenyl (2g):** White solid, MP: 67-70 °C; <sup>1</sup>H NMR (400 MHz, CDCl<sub>3</sub>):  $\delta$  (ppm) 2.37 (s, 12 H), 7.19(s, 4 H), 7.26 (s, 2 H). <sup>13</sup>C NMR (100 MHz, CDCl<sub>3</sub>):  $\delta$  (ppm) 21.40, 125.11, 128.72, 138.10, 141.47. MS (EI): m/z 210.1.

**4, 4'-Di-tert-butyl-1,1'-biphenyl (2h):** White solid, MP: 127-129 °C; <sup>1</sup>H NMR (400 MHz, CDCl<sub>3</sub>):  $\delta$  (ppm) 1.28 (s, 18 H), 7.24 (d, 4 H, J = 8.8 Hz), 7.39 (d, 4 H, J = 8.4 Hz). <sup>13</sup>C NMR (100 MHz, CDCl<sub>3</sub>):  $\delta$  (ppm) 26.39, 29.68, 121.81, 122.35, 126.19, 145.24. MS (EI): m/z 266.1.

**4, 4'-Biphenol (2i):** White solid, MP: 279-282 °C; <sup>1</sup>H NMR (400 MHz, CDCl<sub>3</sub>):  $\delta$  (ppm) 5.60 (s, 2 H), 6.71 (d, 4 H, J = 8.8 Hz), 7.31 (d, 4 H, J = 8.4 Hz). <sup>13</sup>C NMR (100 MHz, CDCl<sub>3</sub>):  $\delta$  (ppm) 113.01, 117.28, 132.55, 154.49. MS (EI): m/z

186.1.

**4, 4'-Diacetylbiphenyl (2j):** White solid, MP: 189-191 °C; <sup>1</sup>H NMR (400 MHz, CDCl<sub>3</sub>): δ (ppm) 2.57 (s, 6 H), 7.66 (d, 4 H, J = 8.4 Hz), 7.83 (d, 4 H, J = 8.4 Hz). <sup>13</sup>C NMR (100 MHz, CDCl<sub>3</sub>): δ (ppm) 26.48, 101.10, 129.73, 136.37, 137.92, 197.34. MS (EI): m/z 238.1.

**3, 3'-Dichloro-1, 1'-biphenyl (2k):** White solid, MP: 28-29 °C; <sup>1</sup>H NMR (400 MHz, CDCl<sub>3</sub>): δ (ppm) 7.33-7.39 (m, 4 H), 7.42 (d, 2 H, J = 7.2 Hz), 7.54 (s, 2 H). <sup>13</sup>C NMR (100 MHz, CDCl<sub>3</sub>): δ (ppm) 125.28, 127.28, 127.90, 130.14, 134.84, 141.63. MS (EI): m/z 223.1.

**1, 6-Diphenylhexane (2l):** White solid, MP: 136-139 °C; <sup>1</sup>H NMR (400 MHz, CDCl<sub>3</sub>): δ (ppm) 2.09-2.16 (m, 4 H), 2.72 (t, 4 H, J = 7.4 Hz), 3.16 (t, 4 H, J = 6.8 Hz), 7.20 (t, 6 H, J = 7.4 Hz), 7.28 (t, 4 H, J = 7.4 Hz). <sup>13</sup>C NMR (100 MHz, CDCl<sub>3</sub>): δ (ppm) 6.40, 34.93, 36.26, 126.22, 128.54, 128.60, 140.44. MS (EI): m/z 238.1.

**1, 2-Di(naphthalen-2-yl)ethane (2m):** White solid, MP: 127-129 °C; <sup>1</sup>H NMR (400 MHz, CDCl<sub>3</sub>): δ (ppm) 4.83 (s, 4 H), 7.46-7.50 (m, 6 H), 7.79-7.84 (m, 8 H). <sup>13</sup>C NMR (100 MHz, CDCl<sub>3</sub>): δ (ppm) 85.49, 125.18, 125.48, 125.92, 126.21, 127.74, 127.90, 128.36, 132.96, 133.39, 138.32. MS (EI): m/z 282.1.

**1, 1'-Biisoquinoline (2n):** Pale yellow solid, MP: 160-162 °C; <sup>1</sup>H NMR (400 MHz, CDCl<sub>3</sub>) δ (ppm): 7.36 (d, 3 H, J = 7.6 Hz), 7.49 (t, 3 H, J = 8.4 Hz), 7.58-7.63 (m, 3 H), 8.11-8.13 (M, 3 H). <sup>13</sup>C NMR (100 MHz, CDCl<sub>3</sub>): δ (ppm) 120.42, 123.74, 124.83, 128.68, 131.86, 141.42, 143.90, 165.51. MS (EI): m/z 256.1.

**5, 5-Biindolyl (2o):** White solid, MP: 197-199 °C; <sup>1</sup>H NMR (400 MHz, CDCl<sub>3</sub>): δ (ppm) 6.49 (s, 2 H), 7.19 (s, 2 H), 7.23-7.28 (m, 4 H), 7.77 (s, 2 H), 7.18 (s, 2 H). <sup>13</sup>C NMR (100 MHz, CDCl<sub>3</sub>): δ (ppm) 102.33, 112.45, 113.05, 123.24, 124.87, 125.38, 129.66, 134.43. MS (EI): m/z 232.1.

**4, 4'-Difluorobiphenyl (2p):** White solid, MP: 94-96 °C; <sup>1</sup>H NMR (400 MHz, CDCl<sub>3</sub>): δ (ppm) 7.10 (t, 4 H, J = 8.4 Hz), 7.45-7.484 (m, 4 H). <sup>13</sup>C NMR (100 MHz, CDCl<sub>3</sub>): δ (ppm) 115.58, 115.80, 128.54, 128.62, 136.39, 136.42, 161.22, 163.67. <sup>19</sup>F NMR (400 MHz, CDCl<sub>3</sub>): δ (ppm) -115.71. MS (EI): m/z 190.1.

**6-Phenyl-6,7-dihydro-5H-dibenzo[c,e]azepine (2q):** White solid, MP: 85-87 °C; <sup>1</sup>H NMR (400 MHz, CDCl<sub>3</sub>): δ (ppm) 4.66 (s, 4 H), 6.56 (d, 4 H, J = 8.0 Hz), 6.72 (t, 1 H, J = 7.2 Hz), 7.13-7.19 (m, 4 H), 7.23-7.29 (m, 4 H), 7.59 (d, 2 H, J = 8.0 Hz); <sup>13</sup>C NMR (100 MHz, CDCl<sub>3</sub>): δ (ppm) 55.37, 112.06, 117.17, 122.77, 127.68, 127.81, 128.57, 129.35, 133.01, 136.48, 148.03. MS (EI): m/z 271.2.

## References

1 M. Zeng, Y. Du, C. Qi, S. Zuo, X. Li, L. Shao and X.-M. Zhang, *Green Chem.*,

2011, **13**, 350-356.

2 C. T. Ng, X. Wang and T. Y. Luh, *J. Org. Chem.*, 1988, **53**, 2536-2539.

3 L. Wang, Y. Zhang, L. Liu and Y. Wang, *J. Org. Chem.*, 2006, **71**, 1284-1287.

4 G. Cravotto, M. Beggiato, A. Penoni, G. Palmisano, S. Tollari, J.-M. Lévêque and W. Bonrath, *Tetrahedron Lett.*, 2005, **46**, 2267-2271.

5 S. Venkatraman and C.-J. Li, *Org. Lett.*, 1999, **1**, 1133-1135.

6 K. Billingsley and S. L. Buchwald, *J. Ame. Chem. Soc.*, 2007, **129**, 3358-3366.

## NMR spectra of all compounds

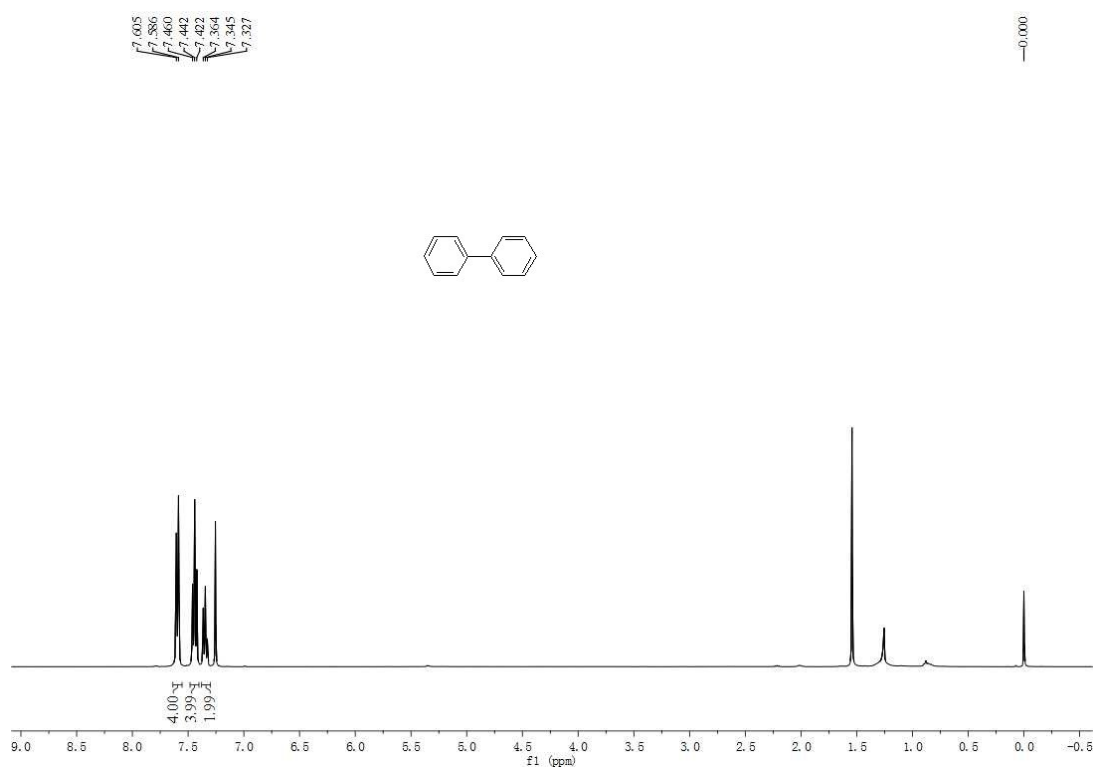

<sup>1</sup>H NMR of **2a** in CDCl<sub>3</sub>

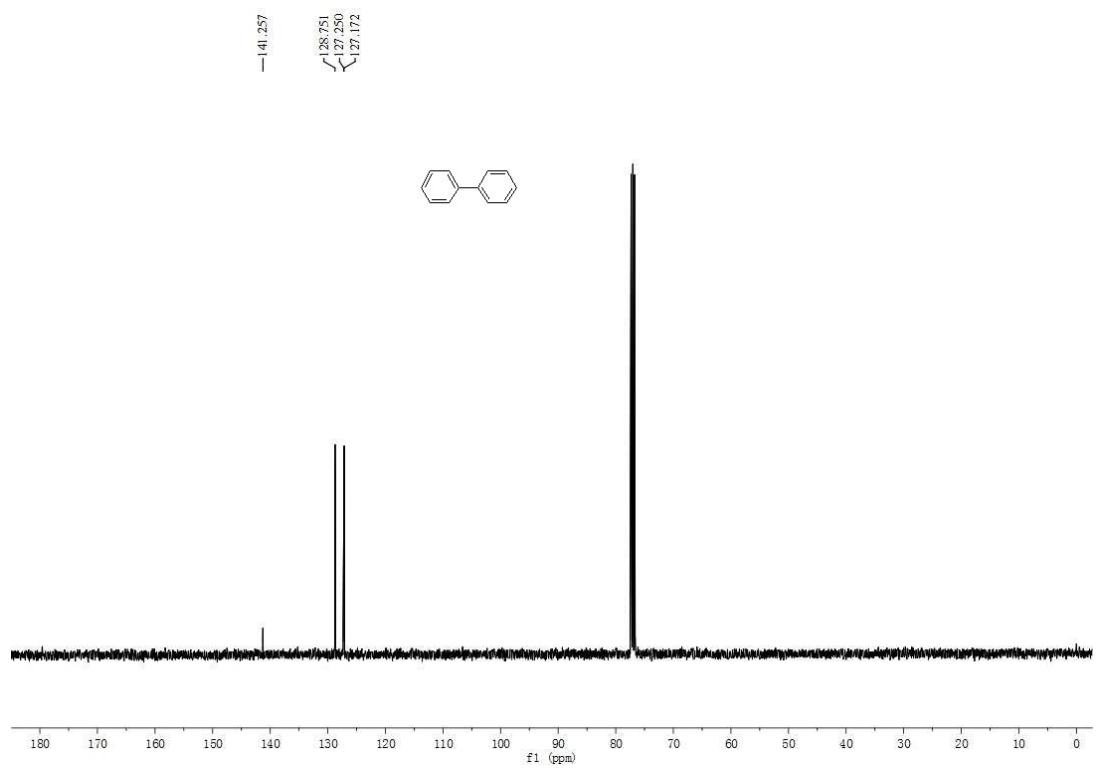

$^{13}\text{C}$  NMR of **2a** in  $\text{CDCl}_3$

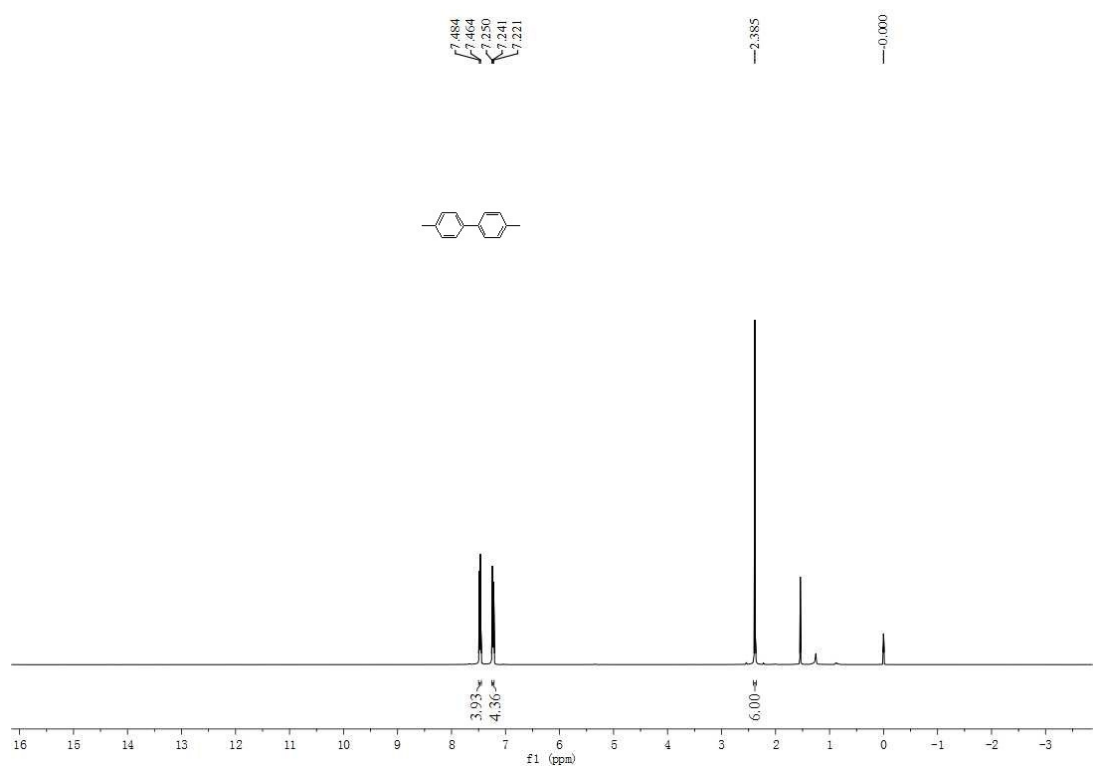

$^1\text{H}$  NMR of **2b** in  $\text{CDCl}_3$



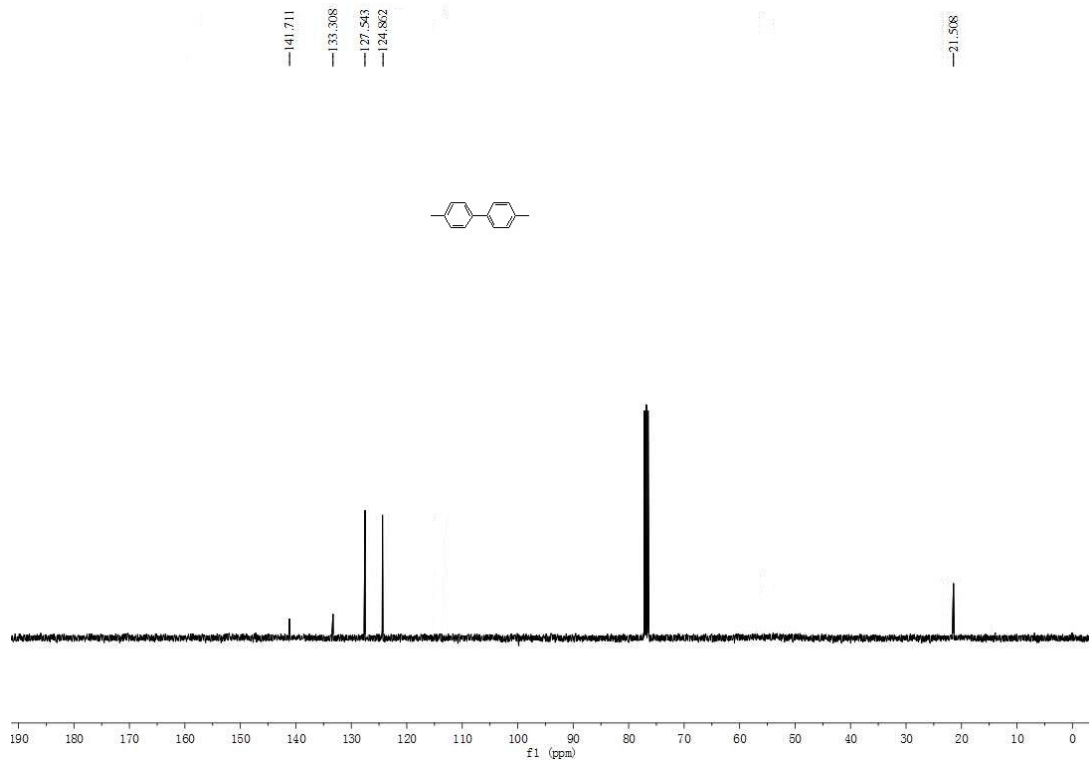

$^{13}\text{C}$  NMR of **2b** in  $\text{CDCl}_3$

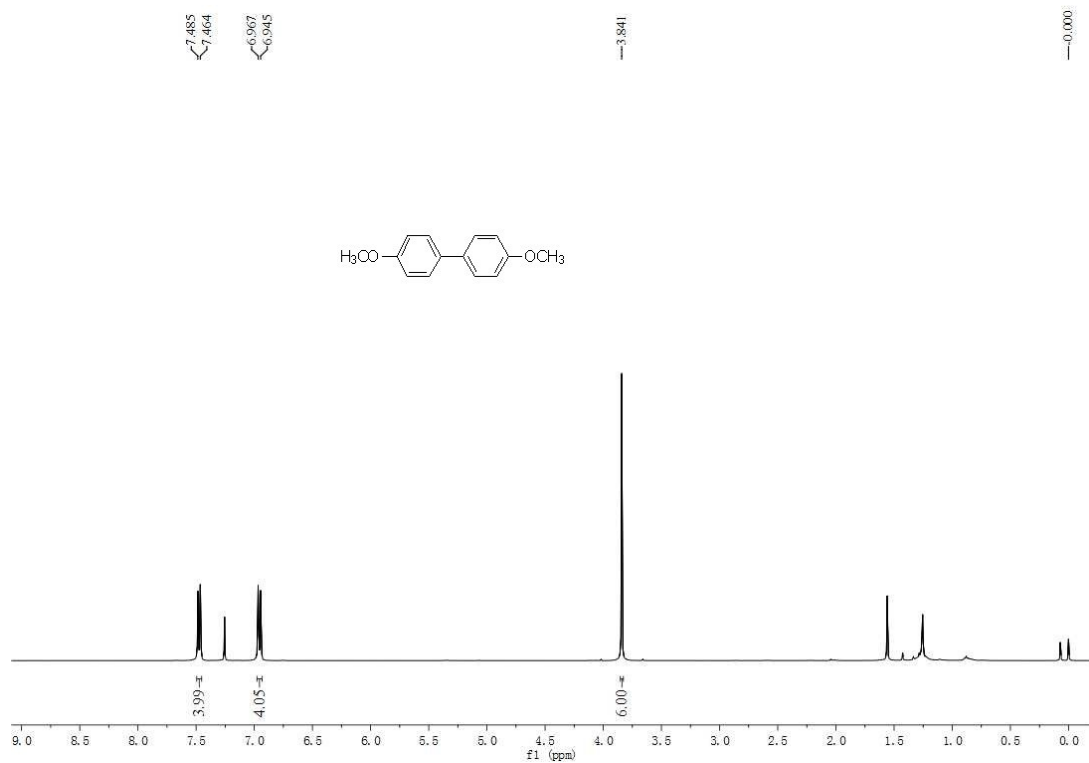

$^1\text{H}$  NMR of **2c** in  $\text{CDCl}_3$

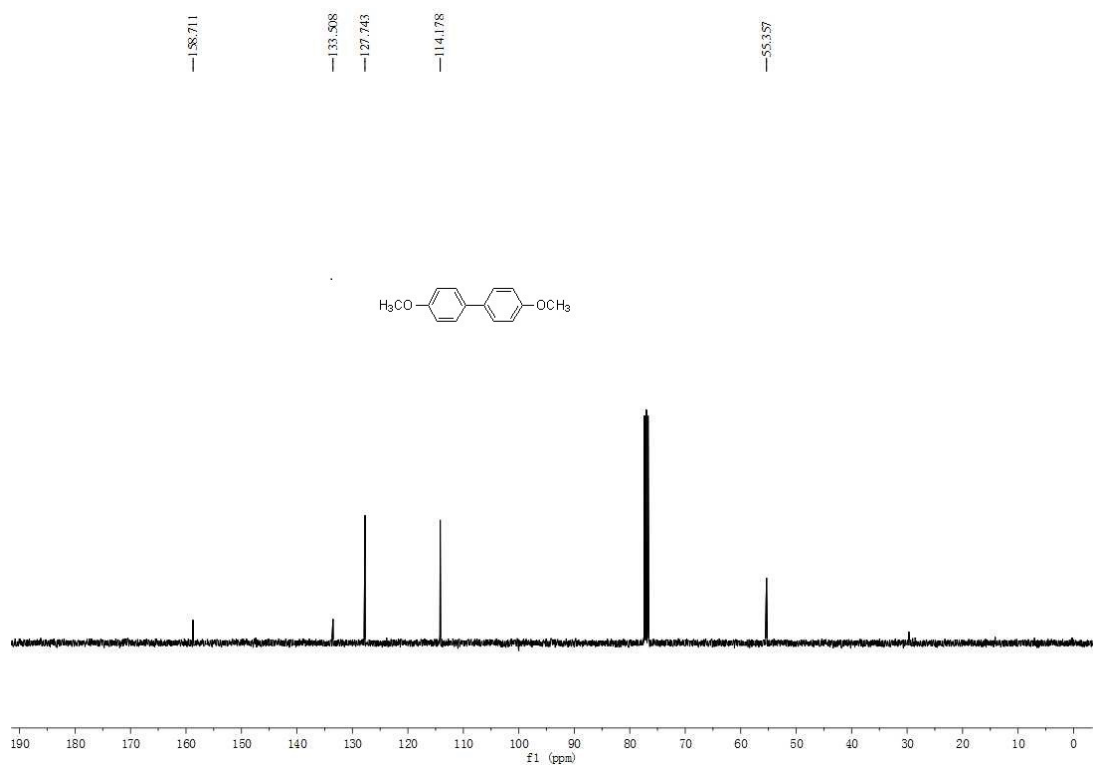

**<sup>13</sup>C NMR of 2c in CDCl<sub>3</sub>**

20151018-xxh-wxy-10  
wxy-10

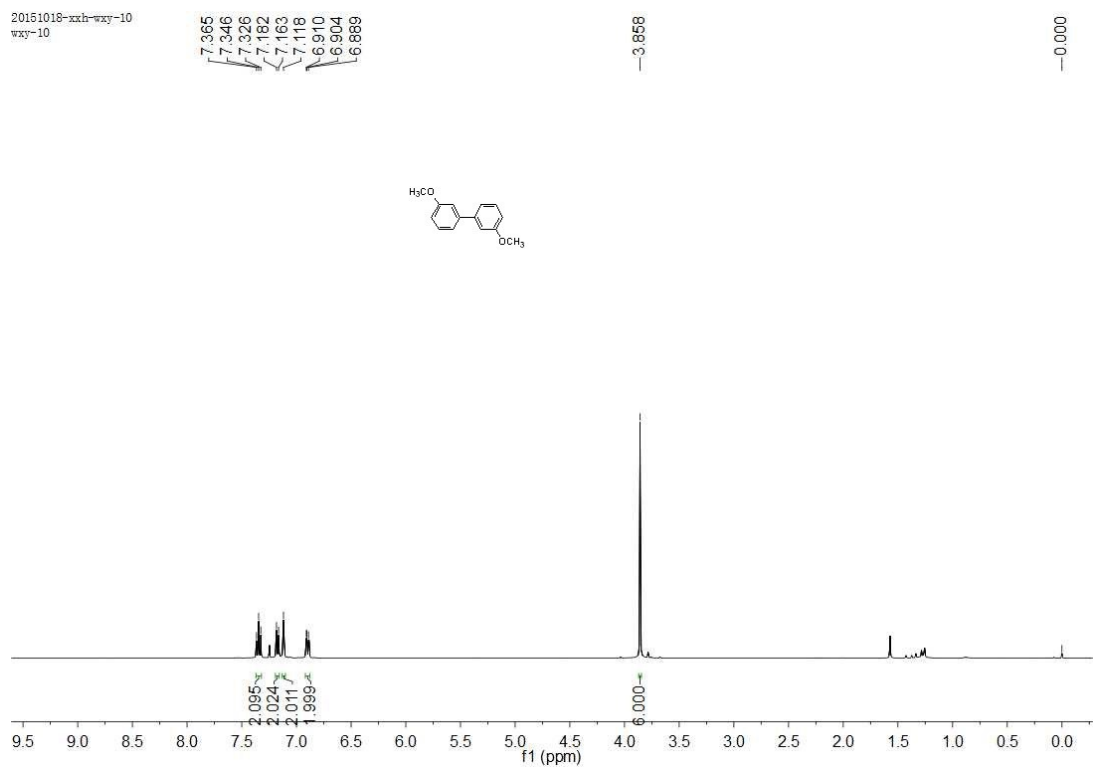

**<sup>1</sup>H NMR of 2d in CDCl<sub>3</sub>**



20161018-xxh-wxy-10  
wxy-10

—159.92  
—142.66  
—129.74  
—119.73  
—112.97  
—112.84  
—55.33

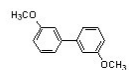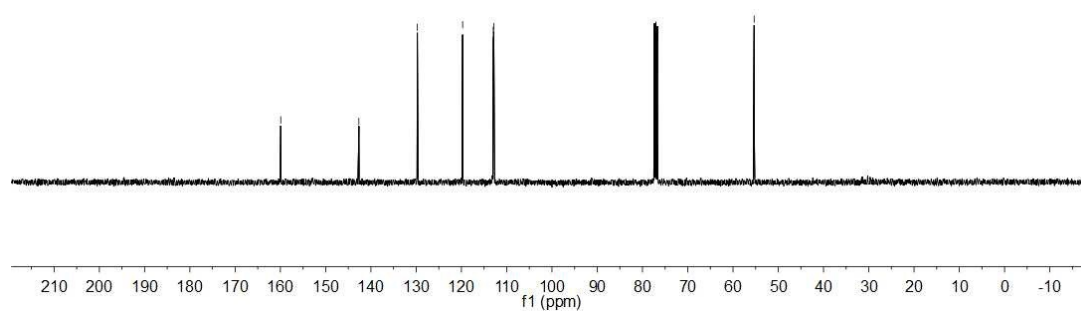

### $^{13}\text{C}$ NMR of **2d** in $\text{CDCl}_3$

20161011-xxh-wxy-05  
wxy-05

7.544  
7.541  
7.524  
7.521  
7.289  
7.289  
7.252  
6.909  
6.889  
6.861  
6.832  
6.813

—3.888

—0.000

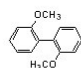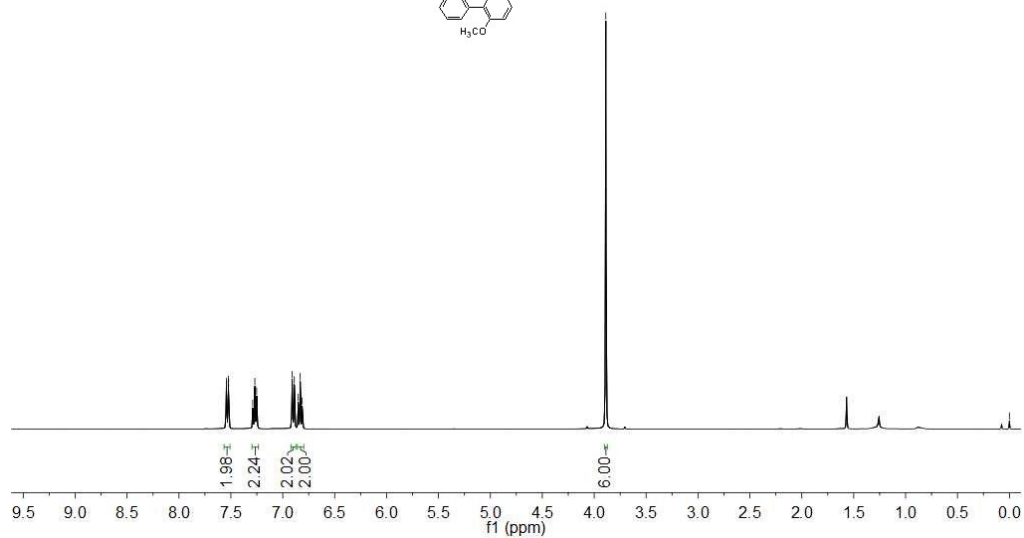

### $^1\text{H}$ NMR of **2e** in $\text{CDCl}_3$

20161011-xxh-wxy-05  
wxy-05

155.88  
133.36  
128.53  
121.82  
112.01  
111.70  
56.16

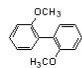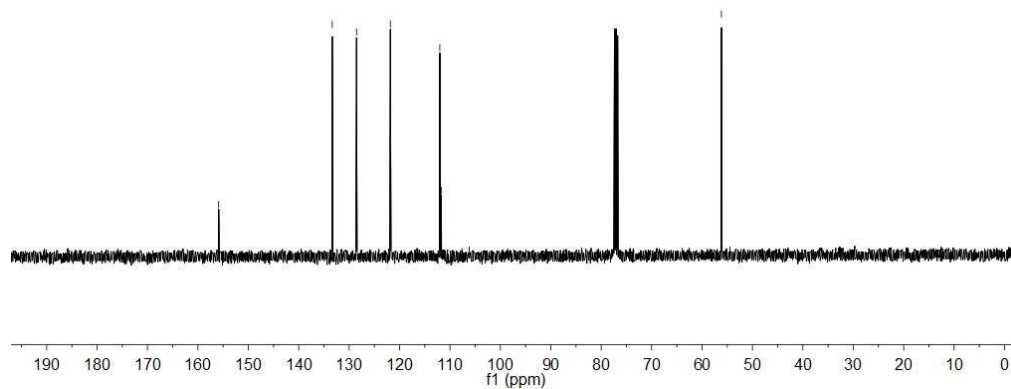

$^{13}\text{C}$  NMR of **2e** in  $\text{CDCl}_3$

20161007-xxh-wxy-03  
wxy-03

8.030  
8.008  
7.620  
7.602  
7.598

0.000

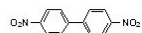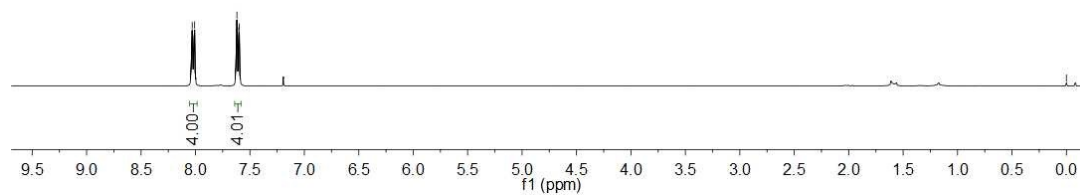

$^1\text{H}$  NMR of **2f** in  $\text{CDCl}_3$

20161007-xxh-wxy-03  
wxy-03

147.03  
132.63  
129.99  
125.01

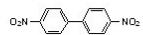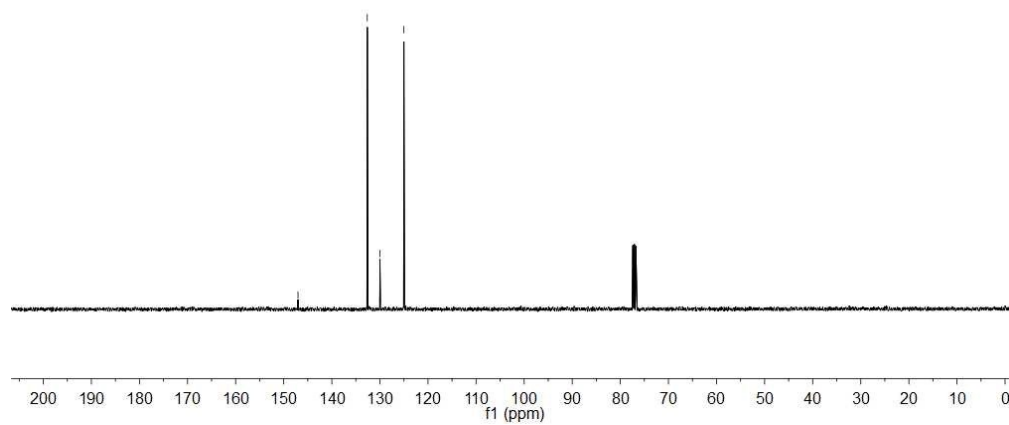

### $^{13}\text{C}$ NMR of **2f** in $\text{CDCl}_3$

20161023-xxh-wxy-13  
wxy-13

7.256  
7.187

2.371

0.000

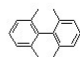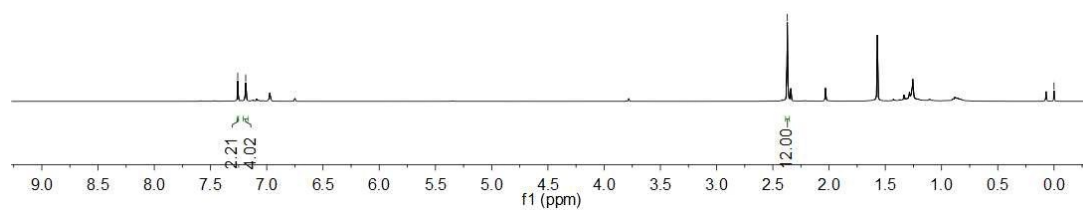

### $^1\text{H}$ NMR of **2g** in $\text{CDCl}_3$

20161023-xxh-wxy-13  
wxy-13

141.47  
138.10  
128.72  
125.11

21.40

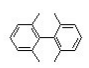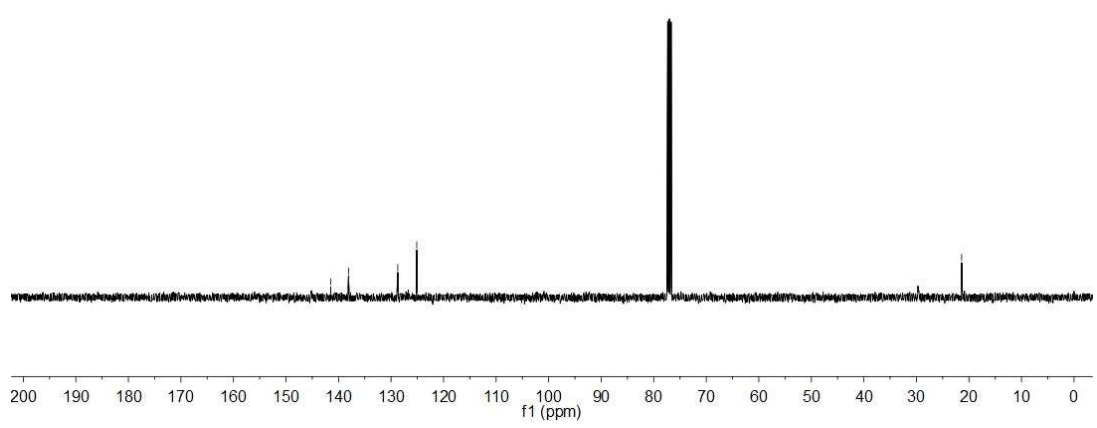

<sup>13</sup>C NMR of **2g** in CDCl<sub>3</sub>

wxy-17  
1022

7.403  
7.382  
7.250  
7.228

1.284

0.000

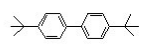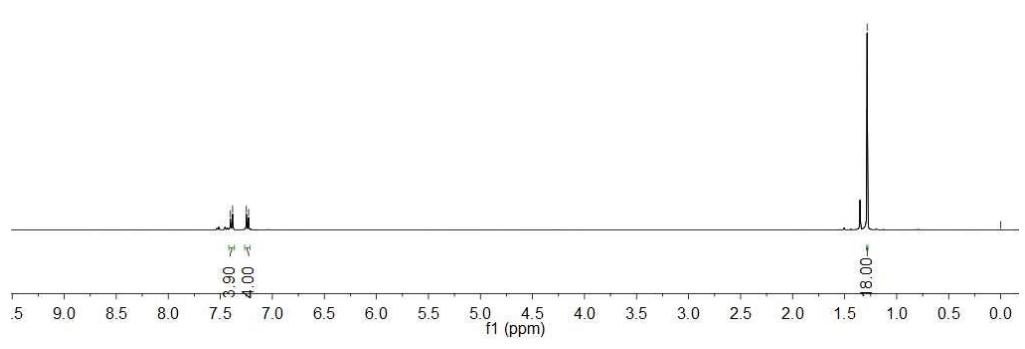

<sup>1</sup>H NMR of **2h** in CDCl<sub>3</sub>

wxy-17c  
FJ-34/C13

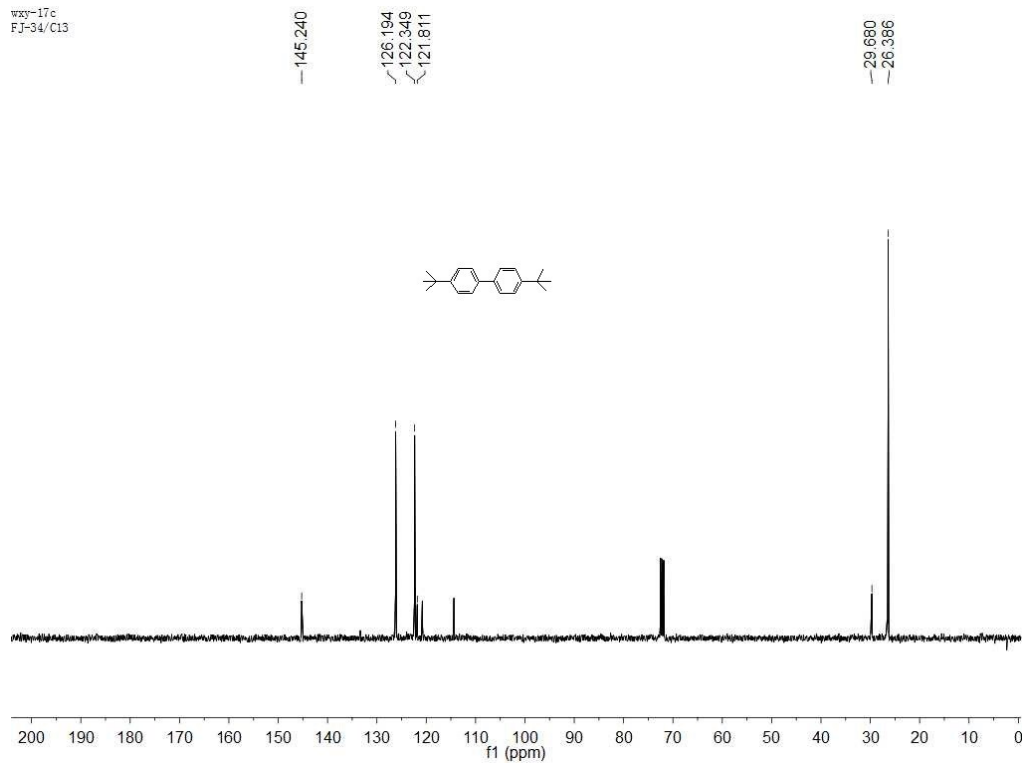

### $^{13}\text{C}$ NMR of **2h** in $\text{CDCl}_3$

20161018-xxh-wxy-09  
wxy-09

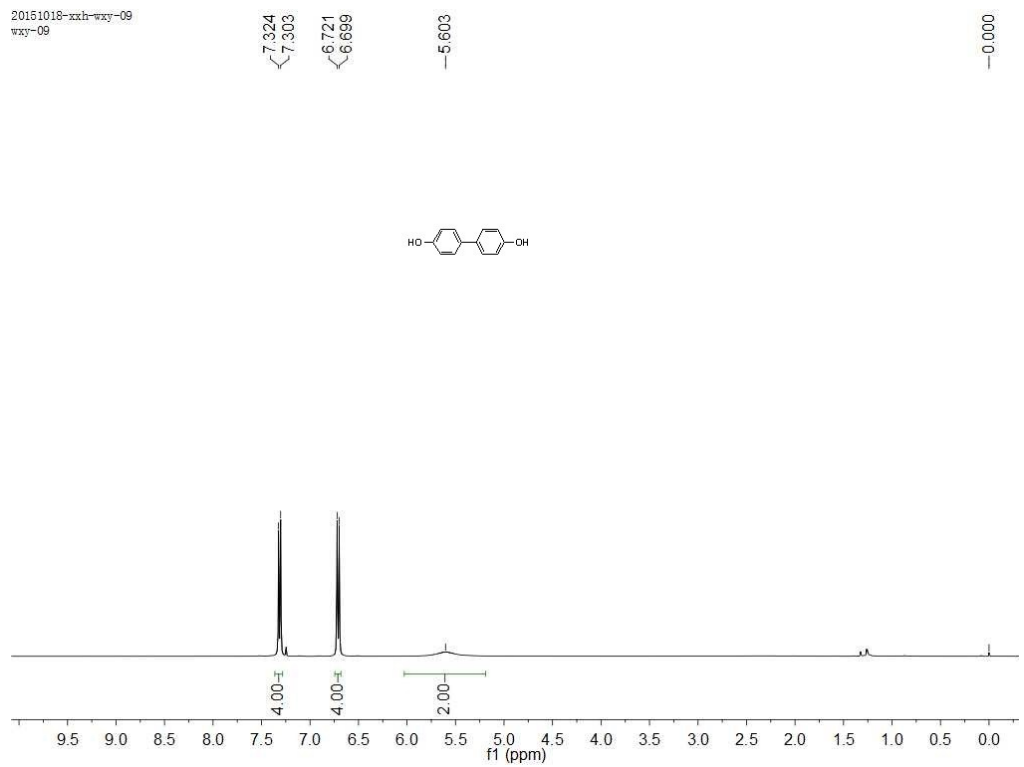

### $^1\text{H}$ NMR of **2i** in $\text{CDCl}_3$

20161018-xxh-wxy-09  
wxy-09

—154.49  
—132.55  
—117.28  
—113.01

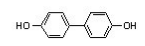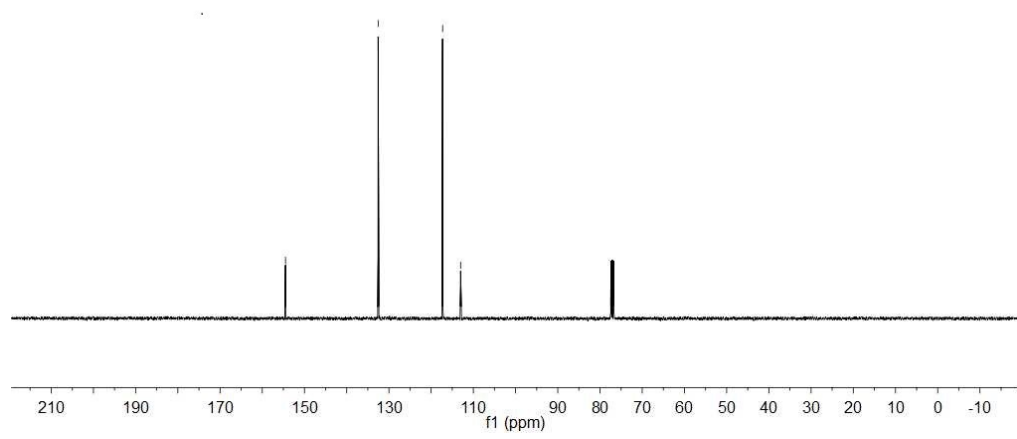

<sup>13</sup>C NMR of **2i** in CDCl<sub>3</sub>

20160613-xxh-wzj-la  
wzj

7.843  
7.822  
7.674  
7.653

—2.574

—0.000

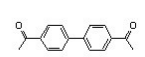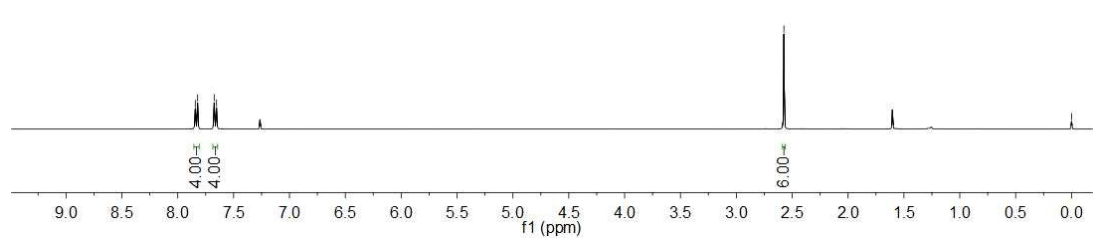

<sup>1</sup>H NMR of **2j** in CDCl<sub>3</sub>



20160613-xxk-wzj-1a  
wzj

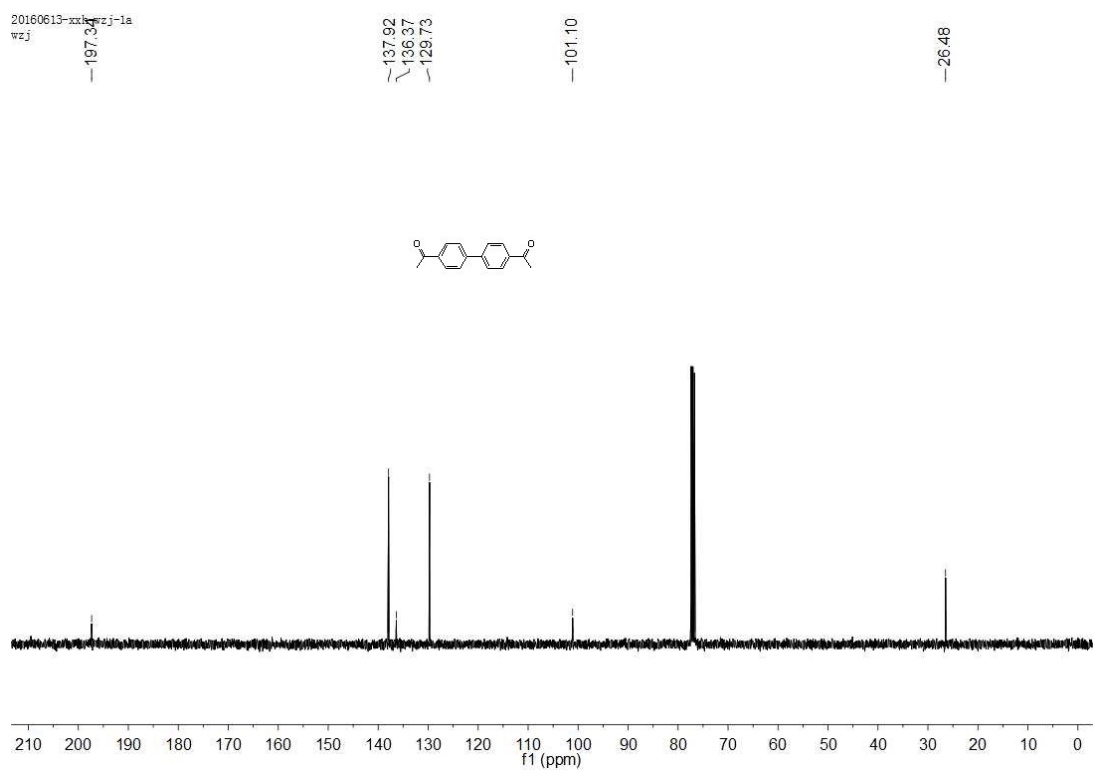

137.92  
136.37  
129.73

101.10

26.48

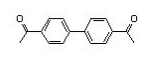

### <sup>13</sup>C NMR of **2j** in CDCl<sub>3</sub>

20161007-xxh-wxy-04  
wxy-04

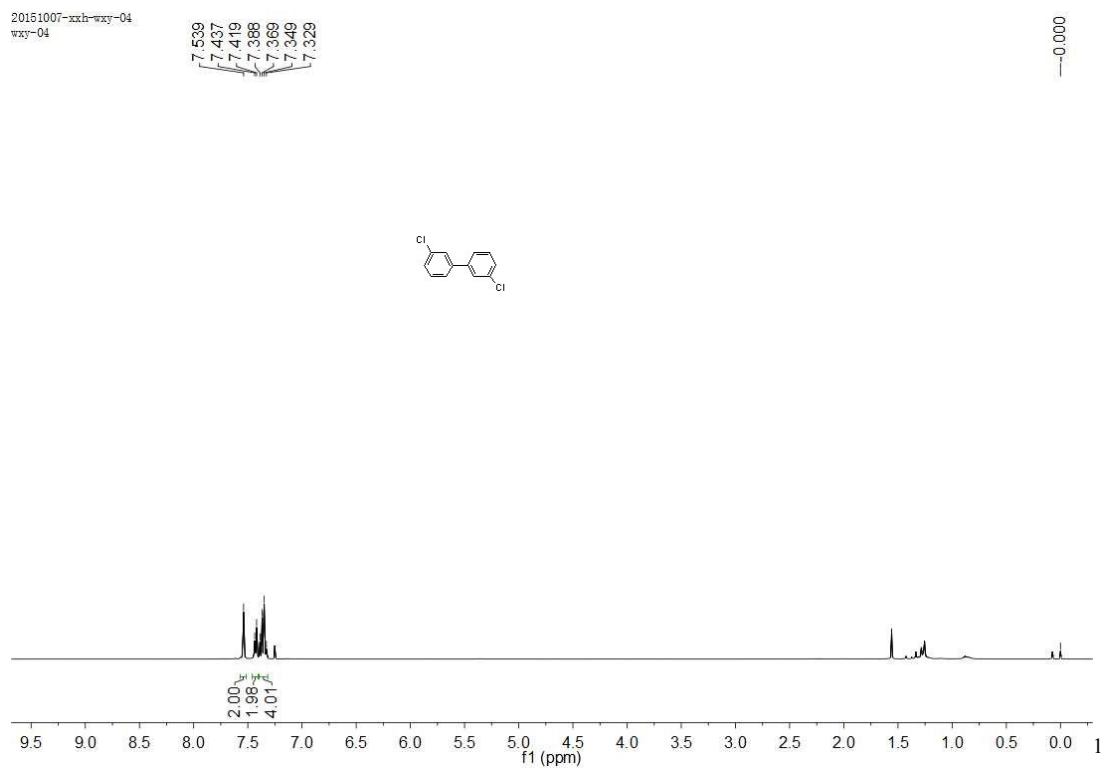

7.539  
7.437  
7.419  
7.388  
7.369  
7.349  
7.329

0.000

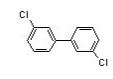

### <sup>1</sup>H NMR of **2k** in CDCl<sub>3</sub>

20151007-xxh-wzy-04  
wzy-04

141.63  
134.84  
130.14  
127.90  
127.28  
125.28

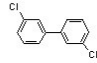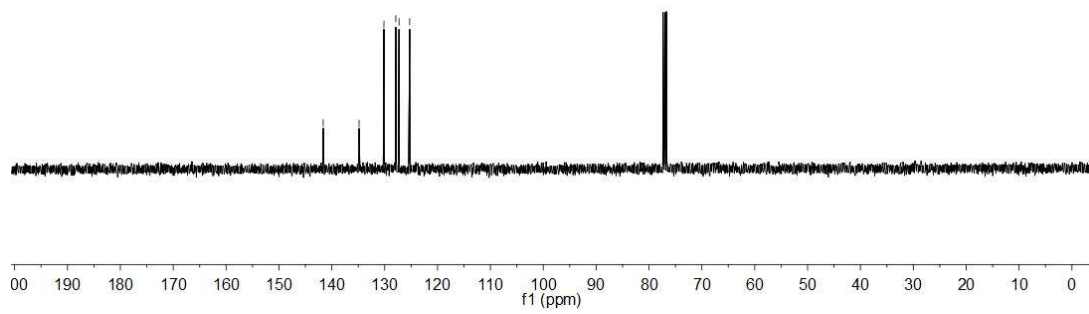

$^{13}\text{C}$  NMR of **2k** in  $\text{CDCl}_3$

20151023-xxh-wzy-16  
wzy-16

7.303  
7.284  
7.266  
7.216  
7.199  
7.179

3.176  
3.159  
3.142  
2.738  
2.720  
2.701  
2.158  
2.140  
2.122  
2.105  
2.087

0.000

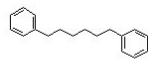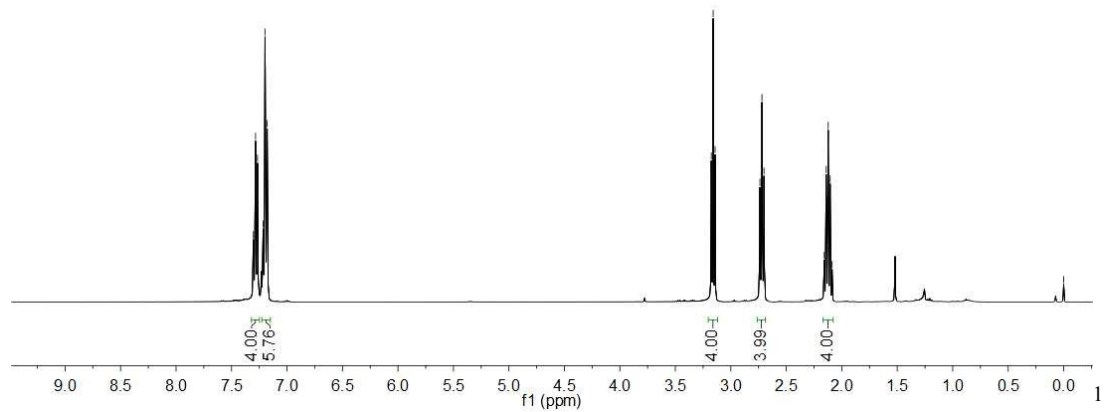

$^1\text{H}$  NMR of **2l** in  $\text{CDCl}_3$

20151023-xxh-wxy-16  
wxy-16

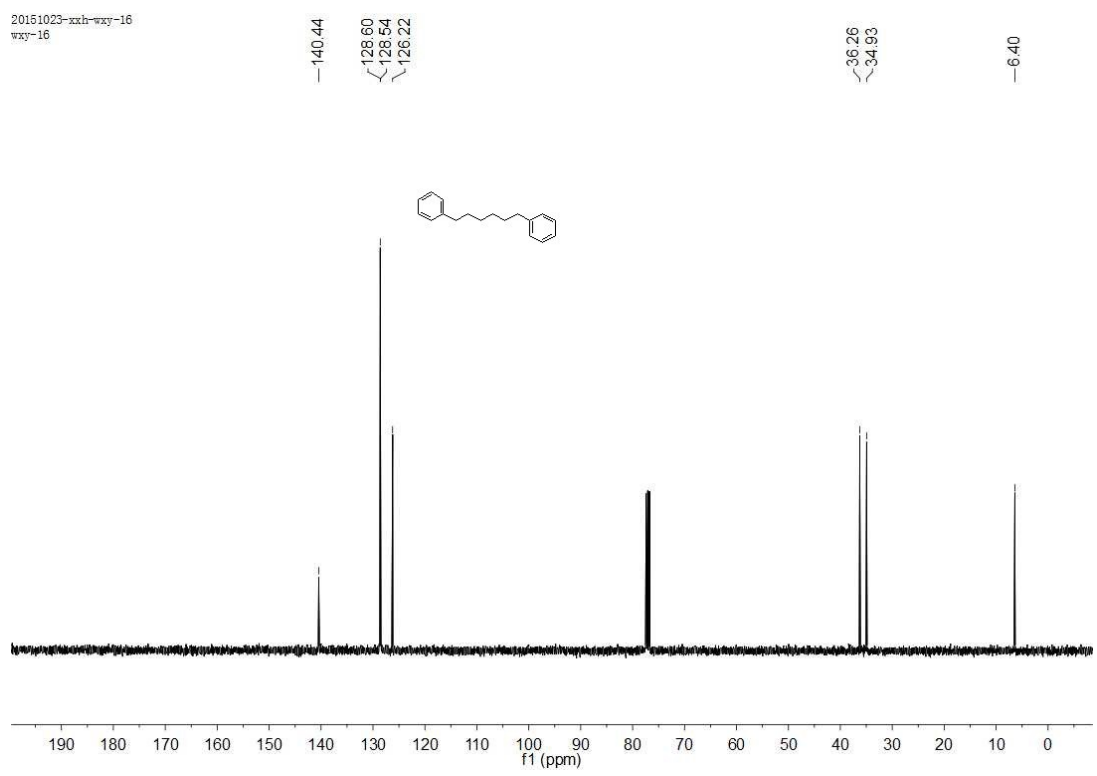

<sup>13</sup>C NMR of **2l** in CDCl<sub>3</sub>

20151023-xxh-wxy-15  
wxy-15

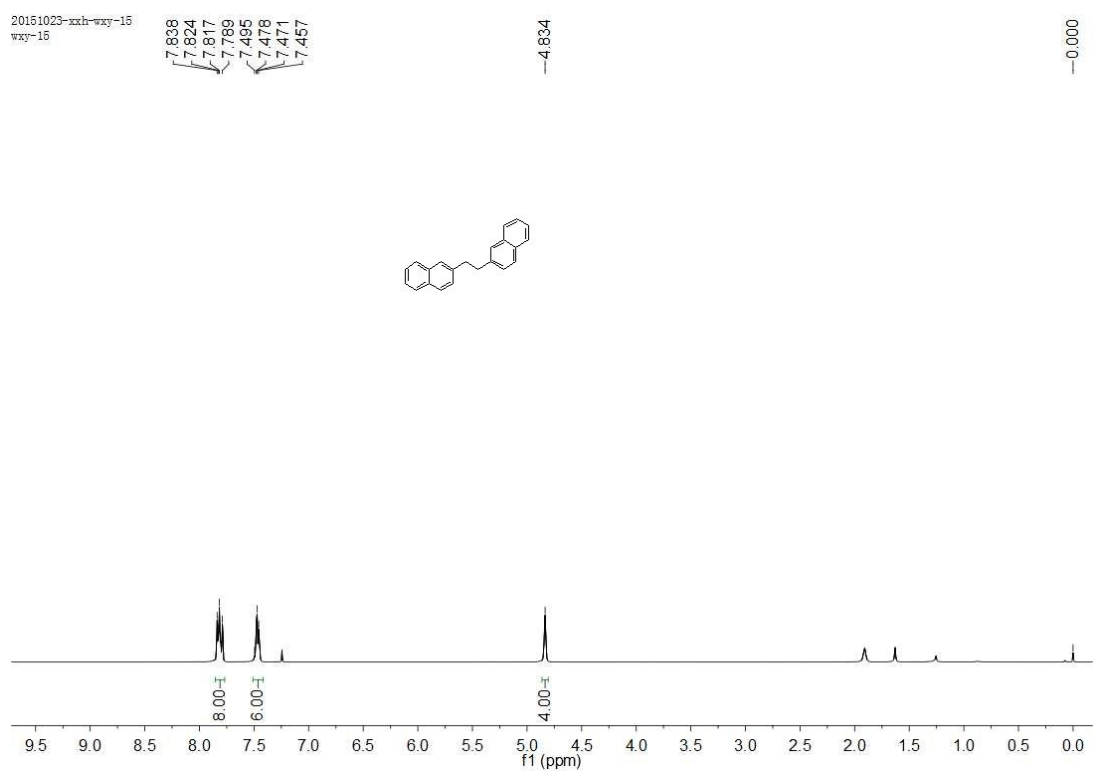

<sup>1</sup>H NMR of **2m** in CDCl<sub>3</sub>

20161023-xxh-wxy-16  
wxy-16

138.32  
133.39  
132.96  
128.36  
127.90  
127.74  
126.21  
125.92  
125.46  
125.18

-65.49

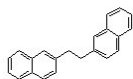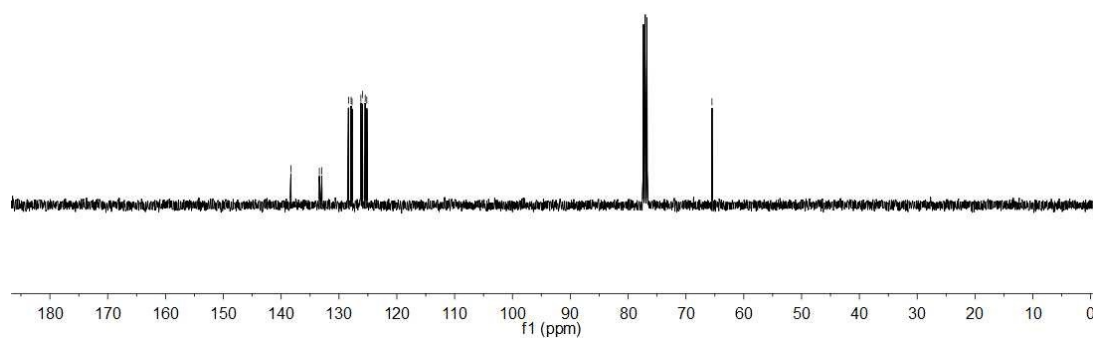

$^{13}\text{C}$  NMR of **2m** in  $\text{CDCl}_3$

wxy-18  
1022

8.134  
8.131  
8.113  
8.111  
7.625  
7.622  
7.606  
7.603  
7.587  
7.584  
7.506  
7.486  
7.463  
7.373  
7.354

-0.000

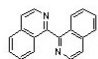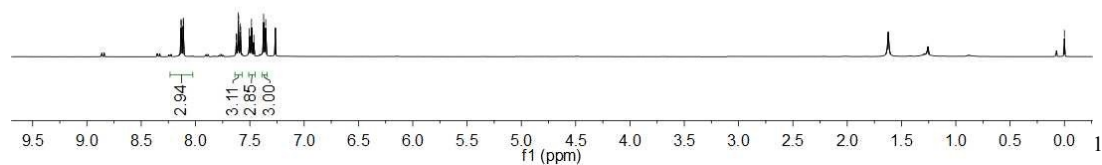

$^1\text{H}$  NMR of **2n** in  $\text{CDCl}_3$

wxy-18c  
FJ-34/C13

165.51  
143.90  
141.42  
131.86  
128.68  
128.42  
124.83  
123.74  
120.42

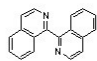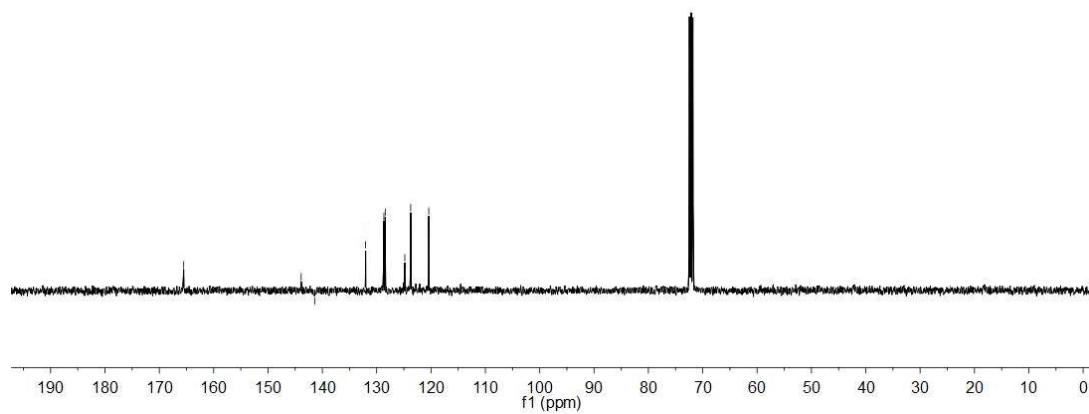

### <sup>13</sup>C NMR of **2n** in CDCl<sub>3</sub>

20160621-xxh-wxy  
1

8.177  
7.766  
7.284  
7.261  
7.254  
7.232  
7.191  
6.488

0.000

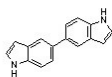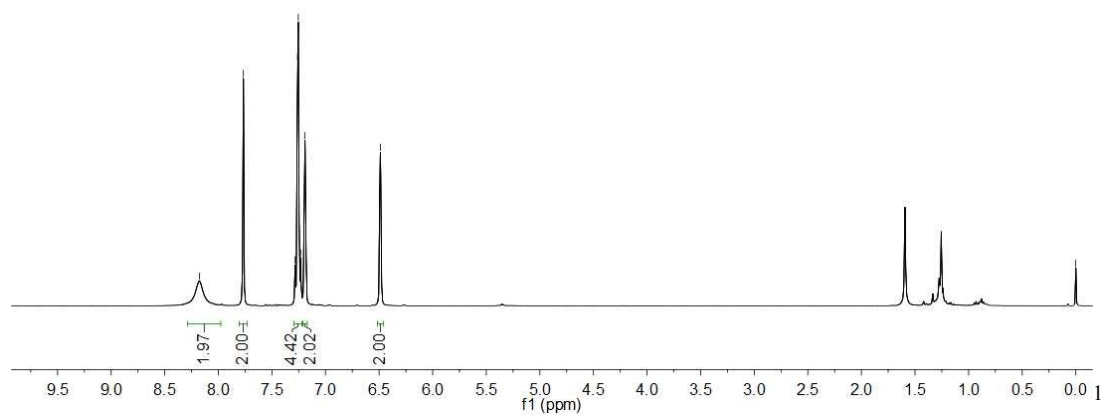

### <sup>1</sup>H NMR of **2o** in CDCl<sub>3</sub>

20160621-zxh-wzy  
1

134.43  
129.66  
125.36  
124.87  
123.24  
113.05  
112.45  
102.33

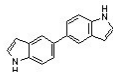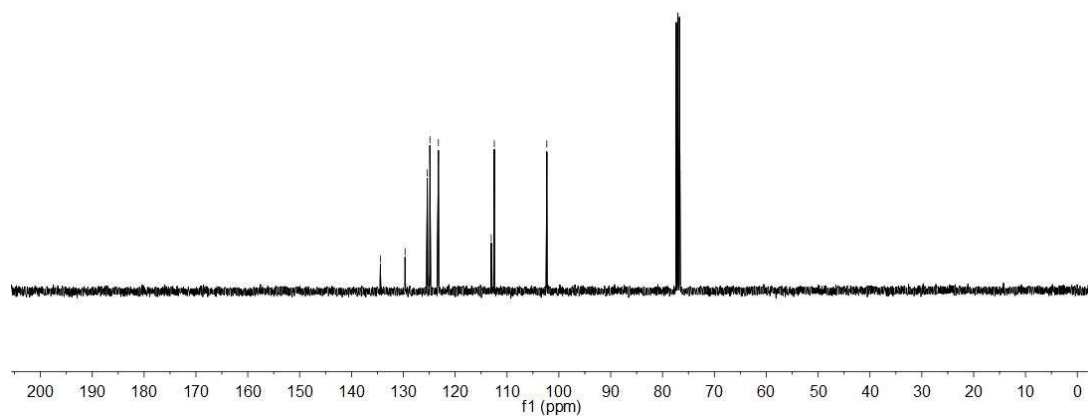

### <sup>13</sup>C NMR of **2o** in CDCl<sub>3</sub>

20160626-zxh-wzj-5a-对氟  
wzj-5a

7.484  
7.470  
7.465  
7.450  
7.121  
7.100  
7.079

-0.000

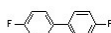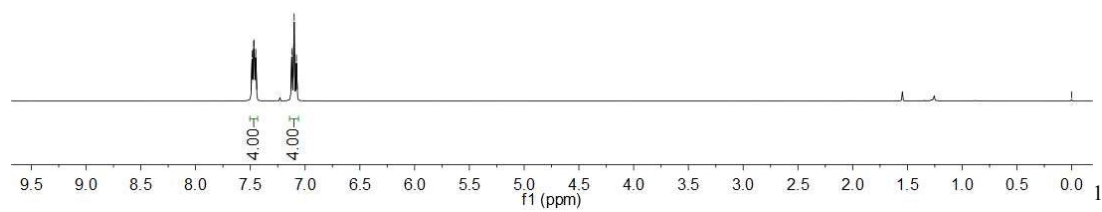

### <sup>1</sup>H NMR of **2p** in CDCl<sub>3</sub>

20160626-xxh-wzj-5a-对氟  
wzj-5a

163.67  
161.22

136.42  
136.39  
128.62  
128.54

115.80  
115.58

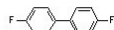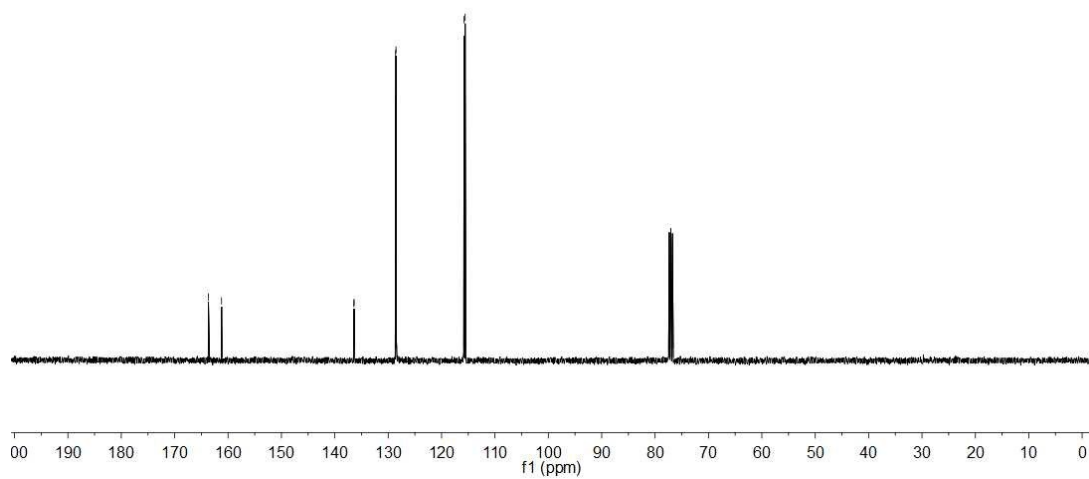

$^{13}\text{C}$  NMR of **2p** in  $\text{CDCl}_3$

20160626-xxh-wzj-5a-对氟  
wzj-5a

115.71

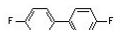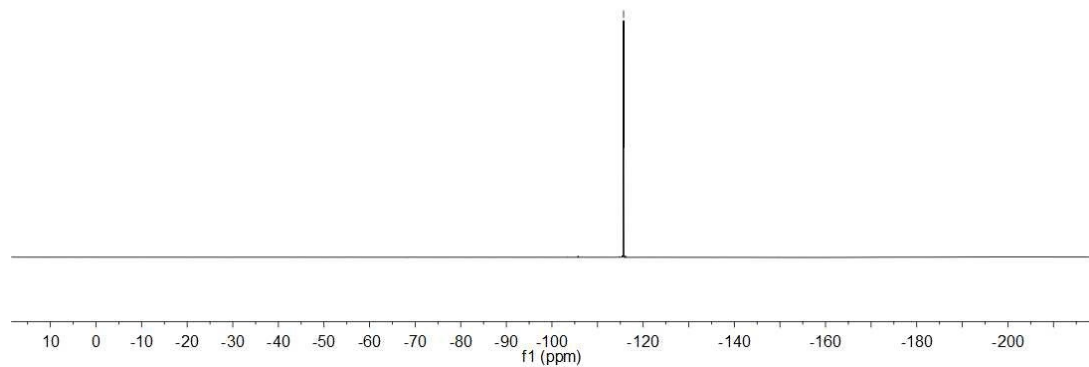

$^{19}\text{F}$  NMR of **2p** in  $\text{CDCl}_3$

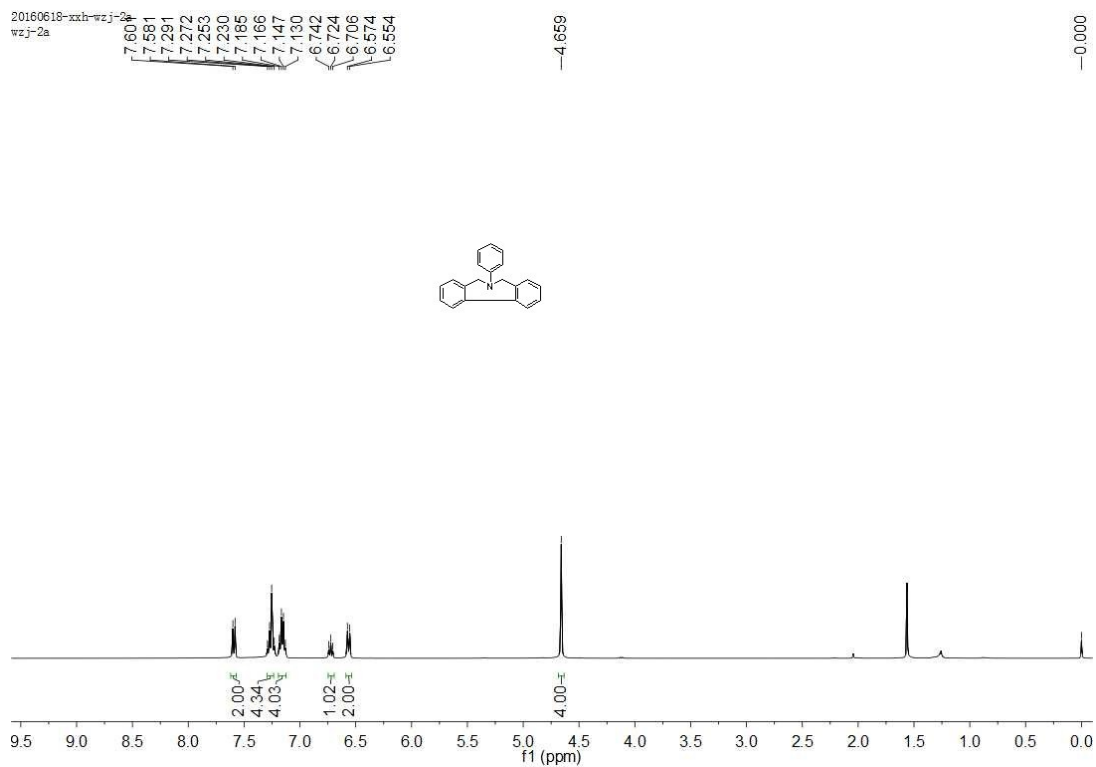

<sup>1</sup>H NMR of **2q** in CDCl<sub>3</sub>

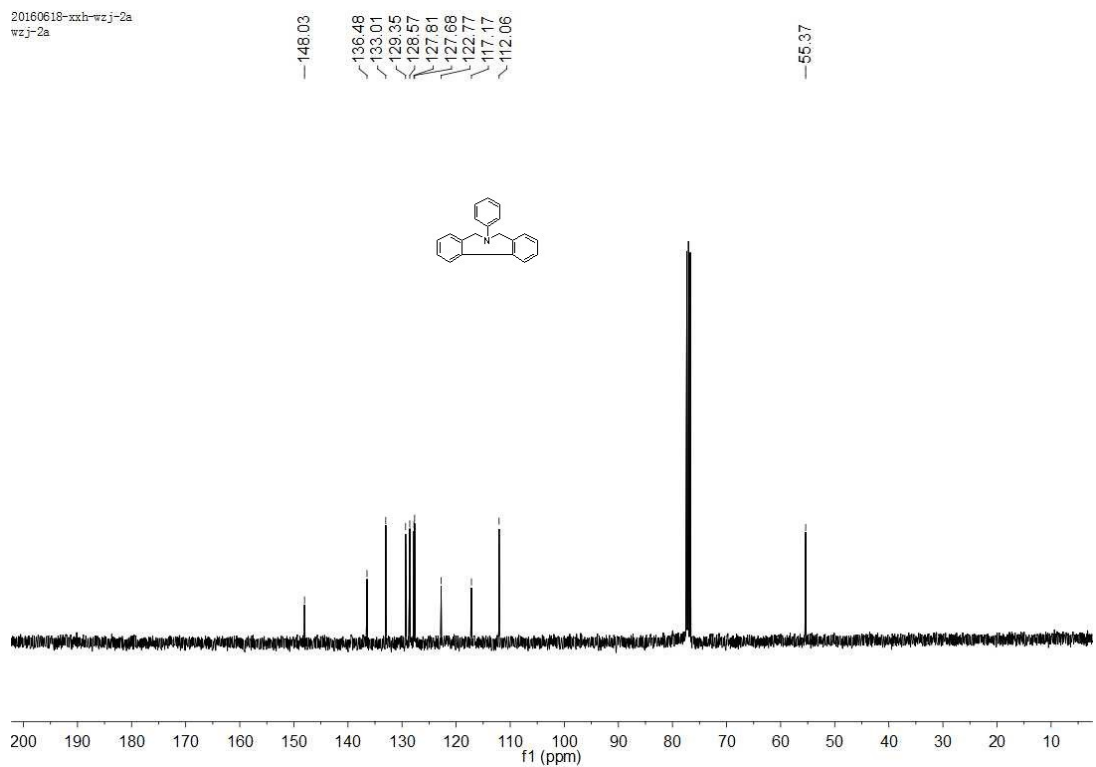

<sup>13</sup>C NMR of **2q** in CDCl<sub>3</sub>
